# Supplementary material for: Different Performances of Different Intelligent Algorithms for Solving FJSP: A Perspective of Structure
Source: Comput Intell Neurosci. 2018 Sep 2;2018:4617816. doi: 10.1155/2018/4617816 (PMC6139217; doi:10.1155/2018/4617816)
Supplement: Supplementary Materials — The supplementary materials titled “original data” are the data of Figures 4 –11. For example, “Figure 3.xlsx” in “original data” is the data presented in Figure 4 and so on. [file 4617816.f1.zip]

Archive with 8 entries (8 files):
- 4617816.f1/figrue 5.xlsx
- 4617816.f1/figure 10.xlsx
- 4617816.f1/figure 3.xlsx
- 4617816.f1/figure 4.xlsx
- 4617816.f1/figure 6.xlsx
- 4617816.f1/figure 7.xlsx
- 4617816.f1/figure 8.xlsx
- 4617816.f1/figure 9.xlsx
