# Supplementary material for: Different Performances of Different Intelligent Algorithms for Solving FJSP: A Perspective of Structure
Source: Comput Intell Neurosci. 2018 Sep 2;2018:4617816. doi: 10.1155/2018/4617816 (PMC6139217; doi:10.1155/2018/4617816)
Supplement: Supplementary Materials — The supplementary materials titled “original data” are the data of Figures 4 –11. For example, “Figure 3.xlsx” in “original data” is the data presented in Figure 4 and so on. [file 4617816.f1.zip › 4617816.f1/figrue 5.xlsx]

## Sheet: Sheet1
		K2	5000	15000	45000	100000	200000	300000	500000
		S1	19	15	15	15	15	15	15		optima
			0.67	0.42	0.38	0.38	0.36	0.36	0.35		population diversity
		S2	26	22	19	18	16	15	14
			0.8	0.75	0.68	0.63	0.59	0.56	0.57
		S3	25	18	15	14	14	14	14
			0.81	0.67	0.42	0.39	0.37	0.35	0.36
		S4	30	25	22	19	17	16	15
			0.82	0.78	0.71	0.65	0.59	0.58	0.57
		S5	24	19	14	14	14	14	14
			0.81	0.73	0.6	0.57	0.54	0.52	0.52
		S6	25	22	15	15	14	14	14
			0.81	0.72	0.52	0.47	0.46	0.46	0.45
		S7	22	15	14	14	14	14	14
			0.74	0.49	0.39	0.38	0.37	0.35	0.35
