# Supplementary material for: Different Performances of Different Intelligent Algorithms for Solving FJSP: A Perspective of Structure
Source: Comput Intell Neurosci. 2018 Sep 2;2018:4617816. doi: 10.1155/2018/4617816 (PMC6139217; doi:10.1155/2018/4617816)
Supplement: Supplementary Materials — The supplementary materials titled “original data” are the data of Figures 4 –11. For example, “Figure 3.xlsx” in “original data” is the data presented in Figure 4 and so on. [file 4617816.f1.zip › 4617816.f1/figure 3.xlsx]

## Sheet: Sheet1
	figure a	K1	5000	10000	15000	20000	25000	30000	50000
		S1	11	11	11	11	11	11	11	optima value
			11.1	11.05	11.1	11	11.05	11.05	11.05	ave.
		S2	11	11	11	11	11	11	11
			12.2	11.5	11.25	11	11	11	11
		S3	11	11	11	11	11	11	11
			11.55	11	11	11	11	11	11
		S4	13	12	11	11	11	11	11
			14.45	12.55	11.8	11.35	11.2	11.2	11
		S5	11	11	11	11	11	11	11
			11.85	11	11	11	11	11	11
		S6	12	11	11	11	11	11	11
			12.05	11.05	11	11	11	11	11
		S7	11	11	11	11	11	11	11
			11.2	11	11.1	11	11.05	11	11
	figure b	K2	5000	15000	45000	100000	200000	300000	500000
		S1	19	15	15	15	15	15	15	optima value
			21.4	16.75	16.75	16.53	16.15	16.25	15.8	ave.
		S2	26	22	19	18	16	15	14
			28.25	23.9	20.65	18.5	17.15	16.35	15.8
		S3	25	18	15	14	14	14	14
			27.6	20.45	15.4	15.2	14.8	14.5	14.85
		S4	30	25	22	19	17	16	15
			32.85	26.7	22.7	19.85	17.5	17.05	16.35
		S5	24	19	14	14	14	14	14
			27.45	21.1	15.59	14.9	14.7	14.6	14.2
		S6	25	22	15	15	14	14	14
			28.6	23.5	16.75	16.4	15.6	15.5	15.25
		S7	22	15	14	14	14	14	14
			25	16.6	15.9	16.1	15.95	16.05	15.7
	figure c	K3	5000	15000	45000	100000	200000	300000	500000
		S1	14	12	12	12	12	12	12	optima value
			17	13.65	13.45	13.05	13.05	12.9	12.85	ave.
		S2	22	17	15	13	13	12	11
			23.5	19.05	15.8	14.25	13.3	12.9	12.2
		S3	21	15	12	12	11	11	11
			23.2	16.4	12.7	12.4	12.2	12.2	11.85
		S4	25	21	16	14	14	12	12
			28.85	22.4	17.15	15.35	14.45	13.65	13.1
		S5	20	15	12	11	11	11	11
			23.9	16.85	13.05	11.65	11.45	11.35	11.25
		S6	23	17	13	12	11	12	11
			25	18.9	13.45	13.4	12.5	13.1	12.25
		S7	17	12	12	12	11	11	11
			19.25	13.7	12.85	12.65	12.35	12.4	12
	figure d	K4	5000	20000	50000	100000	250000	450000	600000
		S1	12	8	8	8	8	7	7	optima value
			13.45	9.95	9.4	9.3	9.05	8.85	8.9	ave.
		S2	19	14	12	10	9	8	8
			21.4	14.9	12.6	11.1	9.7	8.95	8.5
		S3	16	10	7	7	7	7	7
			18.65	10.9	8.25	8.55	8.1	8.25	7.9
		S4	21	15	11	10	9	8	8
			23.5	16.55	13.3	11.3	9.65	8.85	8.8
		S5	15	11	8	7	7	7	7
			18.55	11.65	8.65	7.8	7.5	7.3	7.4
		S6	17	11	8	8	8	8	8
			19.6	13.25	9.85	9.35	8.85	8.55	8.25
		S7	14	8	9	8	7	7	7
			15.85	9.3	9.55	9.45	9.3	8.85	8.5
	figure e	K5	10000	20000	50000	120000	250000	500000	1000000
		S1	21	18	17	17	16	16	16	optima value
			22.6	19.25	18.8	18.2	17.7	17.95	19.1	ave.
		S2	28	25	21	20	17	16	16
			29.9	26.6	23.15	20.65	18.95	17.55	16.65
		S3	29	22	16	14	14	14	15
			30.15	24.1	17.2	15.9	15.7	15.9	16.7
		S4	33	29	23	20	18	17	16
			35.85	29.95	24.85	21.65	19.4	18.15	16.8
		S5	25	21	16	13	12	12	11
			27.35	22.6	16.8	13.8	12.8	12.1	12.15
		S6	30	25	18	17	16	16	16
			31.1	26.55	19.8	18.55	17.8	16.95	16.8
		S7	22	17	16	15	14	13	12
			24.1	19.15	17.05	17	16.65	16.7	15.4
