# Supplementary material for: Different Performances of Different Intelligent Algorithms for Solving FJSP: A Perspective of Structure
Source: Comput Intell Neurosci. 2018 Sep 2;2018:4617816. doi: 10.1155/2018/4617816 (PMC6139217; doi:10.1155/2018/4617816)
Supplement: Supplementary Materials — The supplementary materials titled “original data” are the data of Figures 4 –11. For example, “Figure 3.xlsx” in “original data” is the data presented in Figure 4 and so on. [file 4617816.f1.zip › 4617816.f1/figure 6.xlsx]

## Sheet: Sheet1
		K4	5000	20000	50000	100000	250000	450000	600000
		S1	0.72	0.44	0.43	0.41	0.41	0.39	0.369		population diversity		0.45	1
			0.92	0.52	0.27	0.21	0.11	0.22	0.24		premature convergence rate	0.35
		S2	0.83	0.77	0.74	0.72	0.67	0.64	0.63				0.71	7
			0.64	0.63	0.55	0.57	0.56	0.54	0.55			0.58
		S3	0.85	0.67	0.47	0.43	0.42	0.4	0.4				0.52	3
			0.91	0.91	0.62	0.35	0.13	0.12	0.13			0.45
		S4	0.86	0.79	0.72	0.69	0.64	0.64	0.61				0.7	6
			0.91	0.91	0.83	0.87	0.8	0.84	0.81			0.85
		S5	0.85	0.79	0.71	0.65	0.59	0.59	0.57				0.68	5
			0.92	0.88	0.83	0.77	0.58	0.53	0.43			0.7
		S6	0.84	0.72	0.57	0.66	0.55	0.52	0.5				0.62	4
			0.96	0.85	0.75	0.53	0.78	0.52	0.67			0.72
		S7	0.77	0.5	0.43	0.42	0.4	0.39	0.4				0.47	2
			0.82	0.76	0.34	0.23	0.11	0.27	0.32			0.41
