# Supplementary material for: Different Performances of Different Intelligent Algorithms for Solving FJSP: A Perspective of Structure
Source: Comput Intell Neurosci. 2018 Sep 2;2018:4617816. doi: 10.1155/2018/4617816 (PMC6139217; doi:10.1155/2018/4617816)
Supplement: Supplementary Materials — The supplementary materials titled “original data” are the data of Figures 4 –11. For example, “Figure 3.xlsx” in “original data” is the data presented in Figure 4 and so on. [file 4617816.f1.zip › 4617816.f1/figure 10.xlsx]

## Sheet: Sheet1
		K4	5000	20000	50000	100000	250000	450000	600000
		S1	12	8	8	8	8	7	7	OPTIMA
			0.72	0.44	0.43	0.41	0.41	0.39	0.369	POPULATION DIVERSITY
		S2	19	14	12	10	9	8	8
			0.83	0.77	0.74	0.72	0.67	0.64	0.63
		S3	16	10	7	7	7	7	7
			0.85	0.67	0.47	0.43	0.42	0.4	0.4
		S4	21	15	11	10	9	8	8
			0.86	0.79	0.72	0.69	0.64	0.64	0.61
